# Supplementary material for: The Complement System Contributes to Functional Antibody-Mediated Responses Induced by Immunization with Plasmodium falciparum Malaria Sporozoites
Source: PubMed Central journal article supplement (PMC6013677; doi:10.1128/iai.00920-17), 2018-06-21
Supplement: IAI.00920-17_zii999092463s1.pdf [file IAI.00920-17_zii999092463s1.pdf]

## 1 **Supplemental Materials and Methods**

2

### 3 **Total IgG ELISA**

4 Total IgG concentrations in purified pre-immunization IgGs, post-immunization IgGs and CSP-  
5 depleted post-immunization IgGs were determined by total IgG-ELISAs, as described below  
6 (*see CSP-IgG ELISA*) with small adaptations. Briefly, polystyrene flat-bottom 96-well plates  
7 were coated overnight with 1 ug/ml goat anti-human IgG (ImmunoPure, ThermoFischer  
8 Scientific). Purified IgGs were diluted 1:2,000 in PBS containing 0.05% Tween20 and 1% milk  
9 (PBST/1% milk) and a seven-point 1:3 dilution series was carried out for each IgG sample. As  
10 a standard and positive control, purified malaria-naive IgGs with a fixed concentration (5.7  
11 mg/ml) were diluted 1:2,000 in PBST/1% milk and included on every plate in a seven-point  
12 1:3 dilution series in duplicate. IgG concentrations were calculated in relation to the positive  
13 control.

14

### 15 **CSP-IgG ELISA**

16 Levels of *P. falciparum* circumsporozoite protein (CSP)-specific antibodies in purified IgGs  
17 were determined by ELISAs as previously described with small adaptations (8). Briefly,  
18 polystyrene flat-bottom 96-well plates were coated overnight with 1 ug/ml CSP in PBS  
19 (Gennova Biotechniques Pvt. Ltd., India). Purified IgG samples were diluted 1:50 in PBST/1%  
20 milk and a seven-point 1:2 dilution series was carried out for each IgG sample. As a standard  
21 and positive control, a plasma pool from 100 Tanzanian hyper-immune adults living in a  
22 highly malaria-endemic area (HIT) was diluted 1:200 in PBST/1% milk and included on every  
23 plate in a seven-point 1:2 dilution series in duplicate.

24

## 25 **CSP-IgM ELISA**

26 Levels of *P. falciparum* circumsporozoite protein (CSP)-specific IgM antibodies were  
27 determined by ELISAs that have previously been optimized for type of blocking buffer,  
28 concentrations of IgM horseradish peroxidase (HRP) detection antibodies and plasma  
29 sample dilutions. Polystyrene flat-bottom 96-well plates were coated overnight with 0.5  
30 ug/ml CSP in PBS (Gennova Biotechniques Pvt. Ltd., India). Plates were washed four times  
31 prior to blocking with PBS/3% BSA for one hour at room temperature. Citrated pre- and  
32 post-immunization plasma samples were diluted 1:50 in PBS containing 0.05% Tween20 and  
33 1% BSA (PBST/1% BSA) and a four-point 1:3 dilution series was carried out for each sample.  
34 For CSP-IgM ELISAs the same standard and positive control was used as for CSP-IgG ELISAs;  
35 HIT serum was diluted 1:200 in PBST/1% milk and included on every plate in a seven-point  
36 1:2 dilution series in duplicate. After a three hour incubation step at room temperature,  
37 plates were washed four times with PBS. Goat anti-human IgM-HRP detection antibody  
38 (Dako; P0215) diluted 1/6,250 in PBST was added to each well and after an one hour  
39 incubation step, plates were washed four times with PBS. Bound IgG and IgM antibodies  
40 were detected with a horseradish peroxidase (HRP)-conjugated detection antibody, followed  
41 by development with HRP substrate (tetramethylbenzidine). HRP substrate development  
42 was stopped by the addition of 0.2M sulfuric acid (H<sub>2</sub>SO<sub>4</sub>).

43

## 44 **CSP-specific Ig subclass ELISA**

45 Polystyrene flat-bottom 96-well plates were coated overnight at 4 °C with 0.5 ug/ml CSP in  
46 PBS (Gennova Biotechniques Pvt. Ltd., India). Plates were washed three times with PBST  
47 (PBS containing 0.05% Tween20), blocked for 2 hours at 37 °C with 10% milk in PBS, and

48 again washed three times with PBST. Pre- and Post-immunization plasma samples from CPS-  
49 immunized volunteers (n=15) were diluted 1:100 in PBST/5% milk and a four-point 1:2  
50 dilution series was carried out for each sample. As a standard and positive control, HIT was  
51 diluted 1:100 in PBST/1% milk and included on every plate in a seven-point 1:2 dilution  
52 series in duplicate. Plasma samples were incubated for 2 hours at room temperature and  
53 subsequently washed three times with PBST. IgG subclass antibodies recognizing CSP were  
54 detected by adding 1:1,000 dilution of biotinylated IgG1 (MabTech, 3851-6-250), IgG2  
55 (MabTech, 3852-6-250), IgG3 (MabTech, 3853-6-250) or IgG4 (MabTech, 3854-6-250)  
56 antibodies for 1 hour at room temperature. Following a wash step with PBST, streptavidin-  
57 HRP (MabTech, 3310-9) was added to each well at a 1:1,000 dilution. Wells were washed  
58 three times with PBST, followed by three times with PBS, and developed with HRP substrate  
59 (tetra-methyl-benzidine). The reaction was stopped with 0.2M sulfuric acid. As a technical  
60 control for the detection of IgG1, IgG2, IgG3 and IgG4 antibodies, polystyrene flat-bottom  
61 96-well plates were coated overnight at 4 °C with 1:50 dilution of a malaria-naive donor,  
62 followed by detection steps as described in the previous section.

63

64 For all ELISAs as described above, all samples from each volunteer were measured on the  
65 same plate. Spectrophotometrical absorbance at 450 nm was measured using the iMark  
66 Microplate Absorbance Reader (Bio-Rad). Antibody levels were expressed as arbitrary units  
67 (AU) in relation to the positive control, set at 100 AU (11). ELISA data analysis was performed  
68 with Auditable Data Analysis and Management System for ELISA (ADAMSEL, version 1.1) as  
69 previously described (16).

70

## 71 **IgG and IgM antibody opsonization of whole sporozoites**

72 *P. falciparum* NF54 or NF135.C10 sporozoites collected in Leibovitz culture medium were  
73 added to v-bottom 96-well plates (CoStar) at a concentration of  $5 \times 10^4$  sporozoites/well and  
74 PBS was topped up to 200 ul/well. Samples were centrifuged at 3,220 g for 5 minutes at  
75 room temperature (Eppendorf Centrifuge 5810 R). Sporozoites were incubated with 10%  
76 heat-inactivated pre- or post-immunization serum and 10% heat-inactivated normal human  
77 serum (inactive complement) diluted in PBS for 30 minutes at 37 °C in duplicate (50 ul/well  
78 with 20% total serum in each well). Unstained sporozoites served as an internal control and  
79 were incubated in PBS alone. Other single compensation controls were incubated in the  
80 presence of 10% heat-inactivated post-immunization serum and 10% inactive complement.  
81 Following incubation, samples were washed with PBS and centrifuged at 3,220 g for 5  
82 minutes at room temperature. Subsequently, sporozoites were stained with fluorescently  
83 labeled antibodies targeting sporozoite circumsporozoite protein (CSP; 3SP2-Alexa Fluor-488  
84 at 1:1,000 dilution, labeled in house), IgG antibodies (IgG-PerCP at 1:50 dilution, Jackson  
85 ImmunoResearch laboratories) and IgM antibodies (IgM-Alexa Fluor-647 at 1:1,000 dilution,  
86 Jackson ImmunoResearch laboratories) diluted in PBS/2% bovine serum albumin (BSA), for  
87 30 minutes in the dark at 4 °C. Unstained sporozoites were taken up in PBS/2% BSA and  
88 single compensation controls were taken along (sporozoites stained with only one single  
89 antibody; 3SP2-Alexa Fluor-488, IgG-PerCP or IgM-Alexa Fluor-647). After incubation,  
90 samples were washed with PBS, centrifuged at 3,220 g for 5 minutes at room temperature,  
91 and subsequently fixed with 1% paraformaldehyde (PFA) for 20 minutes in the dark at 4 °C.  
92 Lastly, samples were washed with PBS, centrifuged at 3,220 g for 5 minutes at room  
93 temperature and resuspended in 200 ul PBS. Samples were kept at 4 °C in the dark until flow  
94 cytometric analysis. Flow cytometric analysis was performed with a LSRII flow cytometer (BD

95 BioSciences) and data analysis was performed with FlowJo software (version 10.0.8, Tree  
96 Star).

97

### 98 ***In vitro* complement deposition and sporozoite damage assay**

99 *P. falciparum* NF54 or NF135.C10 sporozoites collected in Leibovitz culture medium were  
100 added to v-bottom 96-well plates (CoStar) at a concentration of  $5 \times 10^4$  sporozoites/well and  
101 PBS was topped up to 200  $\mu$ l/well. Plates were centrifuged at 3,220 g for 5 minutes at room  
102 temperature. Sporozoites were incubated with 10% heat-inactivated pre- or post-  
103 immunization serum and 10% fresh normal human serum (active complement) or 10% heat-  
104 inactive complement diluted in 1x veronal buffer (Lonza BioWhittaker) for 30 minutes at 37  
105 °C in duplicate (total serum in each well: 20%). In case of purified IgGs, sporozoites were  
106 incubated with 10 mg/ml pre-immunization IgGs, post-immunization IgGs or post-  
107 immunization IgGs depleted from CSP in the presence of 10% active complement and diluted  
108 in 1x veronal buffer, for 30 minutes at 37 °C in duplicate. Unstained sporozoites served as an  
109 internal control and were incubated in 1x veronal buffer. Other (single) compensation  
110 controls were incubated in the presence of 10% heat-inactivated post-immunization serum  
111 or 10 mg/ml post-immunization IgGs and 10% active complement in 1x veronal buffer. To  
112 inactivate complement, PBS/20 mM EDTA was added 1:1 to all samples (final concentration:  
113 PBS/10 mM EDTA) and plates were put at 4 °C for 5 minutes to inactivate complement.  
114 Subsequently, samples were washed with PBS and centrifuged at 3,220 g for 5 minutes at  
115 room temperature. Sporozoites were then stained with fluorescently labeled antibodies  
116 targeting sporozoite CSP (3SP2-Alexa Fluor-647 at 1:10,000 dilution), C3 complement protein  
117 deposition (C3-FITC at 1:500 dilution; Cappel, MP Biomedicals) and a fixable viability dye  
118 (eFluor 450 at 1:4,000 dilution; eBioscience) diluted in PBS/2% BSA, for 30 minutes in the

119 dark at 4 °C. Unstained sporozoites were resuspended in PBS/2% BSA and single  
120 compensation controls were taken along: sporozoites stained with 3SP2-Alexa Fluor-647, C3-  
121 FITC or eFluor 450 detection antibodies. After incubation, samples were processed and  
122 analysed as described in the previous section. The geometric mean fluorescent intensity  
123 (MFI) and percent membrane-compromised sporozoites of post-immunization samples were  
124 corrected for that of pre-immunization responses by subtracting the MFI and percent  
125 membrane-compromised cells of pre-immunization responses from that of post-  
126 immunization responses.

127

### 128 ***In vitro* sporozoite infectivity assay of a human hepatoma cell line**

129 Neutralization of *P. falciparum* sporozoite hepatocyte invasion *in vitro* by CPS-induced  
130 antibodies was assessed in a flow-cytometry based *in vitro* invasion assay. Freshly dissected  
131 *P. falciparum* NF54 or NF135.C10 sporozoites were pre-incubated with 10% heat-inactivated  
132 pre- or post-immunization CPS serum for 30 minutes at 4 °C. Subsequently,  $5 \times 10^4$   
133 sporozoites/well were added in duplicate to flat-bottom 96-well plates containing  
134 monolayers of  $5 \times 10^4$  HC-04 cells in the presence of 10% active or inactive complement.  
135 Samples were centrifuged at 3,000 rpm for 10 minutes at room temperature with a low  
136 brake and after 3 hours of incubation at 37 °C in 5% CO<sub>2</sub>, cells were gently washed three  
137 times with PBS to remove excess sporozoites and antibodies. Cells were trypsinized with  
138 0.05% Trypsin-EDTA for a couple of minutes at room temperature and trypsin activity was  
139 subsequently neutralized by adding 10% FBS in PBS. All cells were transferred to a 96-well v-  
140 bottom plate and centrifuged at 1,700 rpm for 4 minutes at 4°C. Supernatant was carefully  
141 removed, samples were fixed and permeabilized with Fixation/Permeabilization buffer  
142 (eBioscience) for 30 minutes at 4 °C. Subsequently, samples were washed with

143 Permeabilization buffer (eBioscience) and centrifuged at 1,700 rpm for 4 minutes at 4 °C.  
144 Intracellular and invaded parasites were stained with an anti-CSP monoclonal antibody  
145 conjugated with fluorescent Alexa Fluor 488 (3SP2-Alexa Fluor-488; diluted 1:160 in 10% FBS  
146 in PBS), and incubated for 30 minutes in the dark at 4 °C. Samples were again washed with  
147 Permeabilization buffer and pellets were taken up in 1% PFA, transferred to micronic tubes  
148 (Micronic), and put at 4 °C in the dark until flow cytometric analysis on the same day. Flow  
149 cytometric analysis was performed with a Gallios (Beckman Coulter) flow cytometer and  
150 data were analysed with FlowJo software (version 10.0.8, Tree Star). The percentage of CSP-  
151 positive sporozoites was first corrected for background reactivity by subtracting the  
152 background (uninfected HC-04 cells in the presence of 3SP2-Alexa Fluor-488 antibody). The  
153 percent invasion inhibition was calculated as follows:  $1 - (\text{average \% CSP-positive cells in}$   
154  $\text{post-immunization cultures} / \text{average \% CSP-positive cells in pre-immunization cultures}) *$   
155 100%.

156 **References**

- 157 1. Delemarre BJ, van der Kaay HJ. 1979. [Tropical malaria contracted the natural way in  
158 the Netherlands]. *Ned Tijdschr Geneeskd* 123:1981-2.
- 159 2. Teirlinck AC, Roestenberg M, van de Vegte-Bolmer M, Scholzen A, Heinrichs MJ,  
160 Siebelink-Stoter R, Graumans W, van Gemert GJ, Teelen K, Vos MW, Nganou-  
161 Makamdop K, Borrmann S, Rozier YP, Erkens MA, Luty AJ, Hermsen CC, Sim BK, van  
162 Lieshout L, Hoffman SL, Visser LG, Sauerwein RW. 2013. NF135.C10: a new  
163 *Plasmodium falciparum* clone for controlled human malaria infections. *J Infect Dis*  
164 207:656-60.
- 165 3. McCall MBB, Wammes LJ, Langenberg MCC, van Gemert GJ, Walk J, Hermsen CC,  
166 Graumans W, Koelewijn R, Franetich JF, Chishimba S, Gerdson M, Lorthiois A, van de  
167 Vegte M, Mazier D, Bijker EM, van Hellemond JJ, van Genderen PJJ, Sauerwein RW.  
168 2017. Infectivity of *Plasmodium falciparum* sporozoites determines emerging  
169 parasitemia in infected volunteers. *Sci Transl Med* 9.
- 170 4. Hermsen CC, Telgt DS, Linders EH, van de Locht LA, Eling WM, Mensink EJ, Sauerwein  
171 RW. 2001. Detection of *Plasmodium falciparum* malaria parasites in vivo by real-time  
172 quantitative PCR. *Mol Biochem Parasitol* 118:247-51.
- 173 5. Walk J, Schats R, Langenberg MC, Reuling IJ, Teelen K, Roestenberg M, Hermsen CC,  
174 Visser LG, Sauerwein RW. 2016. Diagnosis and treatment based on quantitative PCR  
175 after controlled human malaria infection. *Malar J* 15:398.
- 176 6. Roestenberg M, McCall M, Hopman J, Wiersma J, Luty AJ, van Gemert GJ, van de  
177 Vegte-Bolmer M, van Schaijk B, Teelen K, Arens T, Spaarman L, de Mast Q, Roeffen  
178 W, Snounou G, Renia L, van der Ven A, Hermsen CC, Sauerwein R. 2009. Protection  
179 against a malaria challenge by sporozoite inoculation. *N Engl J Med* 361:468-77.
- 180 7. Nahrendorf W, Scholzen A, Bijker EM, Teirlinck AC, Bastiaens GJ, Schats R, Hermsen  
181 CC, Visser LG, Langhorne J, Sauerwein RW. 2014. Memory B-cell and antibody  
182 responses induced by *Plasmodium falciparum* sporozoite immunization. *J Infect Dis*  
183 210:1981-90.
- 184 8. Walk J, Reuling IJ, Behet MC, Meerstein-Kessel L, Graumans W, van Gemert GJ,  
185 Siebelink-Stoter R, van de Vegte-Bolmer M, Janssen T, Teelen K, de Wilt JHW, de  
186 Mast Q, van der Ven AJ, Diez Benavente E, Campino S, Clark TG, Huynen MA,  
187 Hermsen CC, Bijker EM, Scholzen A, Sauerwein RW. 2017. Modest heterologous  
188 protection after *Plasmodium falciparum* sporozoite immunization: a double-blind  
189 randomized controlled clinical trial. *BMC Med* 15:168.
