# Supplementary material for: The Complement System Contributes to Functional Antibody-Mediated Responses Induced by Immunization with Plasmodium falciparum Malaria Sporozoites
Source: PubMed Central journal article supplement (PMC6013677; doi:10.1128/iai.00920-17), 2018-06-21
Supplement: IAI.00920-17_zii999092463s4.pdf [file IAI.00920-17_zii999092463s4.pdf]

| Volunteer ID | Post-immunization IgG<br>(HIT=100 AU) | CSP-depleted post-immunization<br>IgG<br>(HIT=100 AU) | Percent CSP depleted from<br>post-immunization IgG (%) |
|--------------|---------------------------------------|-------------------------------------------------------|--------------------------------------------------------|
| 1            | 200.7                                 | 39.4                                                  | 80.4                                                   |
| 2            | 1316.0                                | 45.5                                                  | 96.5                                                   |
| 3            | 175.5                                 | 14.5                                                  | 91.7                                                   |
| 4            | 25.9                                  | 5.4                                                   | 79.2                                                   |
| 5            | 1339.4                                | 50.7                                                  | 96.2                                                   |

**Table S2: CSP depletion efficacy**
